# Supplementary material
Source: publisher site journal article supplement (https://cdn.jamanetwork.com/ama/content_public/journal/intemed/937087/ioi180015supp2_prod.pdf)
Supplement: Supplementary file 1 [file ioi180015supp2_prod.pdf]

## Supplementary Online Content

Freund Y, Goulet H, Leblanc J, et al. Effect of systematic physician cross-checking on reducing adverse events in the emergency department: the CHARMED cluster randomized trial. *JAMA Intern Med*. Published online April 23, 2018.  
doi:10.1001/jamainternmed.2018.0607

**eFigure 1.** Adverse events form

**eTable 1.** Characteristics of participating emergency departments

**eTable 2.** Main characteristics in the six centers

**eTable 3.** Per-protocol population

**eTable 4.** Number (%) of adverse events

This supplementary material has been provided by the authors to give readers additional information about their work.



**Known at risk situation**

- Major procedure (Sedation, intubation, ponction) Yes No
- Catecholamine or vasopressor introduction Yes No
- Mechanical ventilation or NIV Yes No
- Total length of stay in the ED > 4 hours Yes No
- Electrolyte disturbances (Dysnatraemia, Dyskalaemia,...) Yes No

**At least one aspect of the ED care is suboptimal**

Yes No

**Suspicion of :**

- Guideline violation (local or national) Yes No
- Medication error Yes No
- Delay for recommended treatment Yes No
- Insufficient monitoring Yes No
- Error in ordering test Yes No
- Delay in ordering test Yes No
- Lack of prevention (eg no LMWH) Yes No

**Supplemental figure 1: adverse events form.**

| Center | annual ED census | Number of ED beds | Number of hospital beds | Trauma center | Setting    | Trainees (N) | Senior emergency physicians (N) | Mean years in practice of senior emergency physicians |
|--------|------------------|-------------------|-------------------------|---------------|------------|--------------|---------------------------------|-------------------------------------------------------|
| 1      | 40 000           | 11                | 500                     | No            | Urban      | 6            | 13                              | 5                                                     |
| 2      | 55 000           | 24                | 2142                    | No            | Semi rural | 15           | 25                              | 10                                                    |
| 3      | 70 000           | 37                | 700                     | Yes           | Urban      | 12           | 25                              | 7                                                     |
| 4      | 66 000           | 22                | 1800                    | Yes           | Urban      | 10           | 25                              | 6                                                     |
| 5      | 60 000           | 36                | 620                     | No            | Urban      | 9            | 25                              | 6                                                     |
| 6      | 44 000           | 14                | 600                     | No            | Urban      | 7            | 13                              | 5                                                     |

**Supplemental Table 1: Characteristics of participating emergency departments.**

All centers were academic emergency departments, adult only, saw both medical and surgical patients and have 24/7 coverage by a senior emergency physician. Trainees are post-graduate young doctors in their 3 to 6 years internship. Senior emergency physicians are board certified physicians who completed their training.

| Center No.   | Annual census | Age - years mean (SD) |         | Median waiting time (IQR), minutes |                          | Median length of ED stay (IQR), hours |                          | No comorbidity N (%) |         | Cross-checked patient N (%) |       | Medical error N (%) |         |
|--------------|---------------|-----------------------|---------|------------------------------------|--------------------------|---------------------------------------|--------------------------|----------------------|---------|-----------------------------|-------|---------------------|---------|
|              |               | CC                    | Std     | CC                                 | Std                      | CC                                    | Std                      | CC                   | Std     | CC                          | Std   | CC                  | Std     |
| N per center |               |                       |         |                                    |                          |                                       |                          |                      |         |                             |       |                     |         |
| 1            | 40 000        | 57 (21)               | 58 (24) | 01:01<br>[00:40 ; 01:49]           | 01:00<br>[00:34 ; 01:25] | 06:33<br>[04:18 ; 11:56]              | 06:22<br>[04:33 ; 10:43] | 40 (27)              | 52 (37) | 62 (44)                     | 0 (0) | 10 (7)              | 23 (16) |
| 2            | 55 000        | 67 (20)               | 69 (21) | 01:03<br>[00:32 ; 01:50]           | 00:46<br>[00:31 ; 01:08] | 12:03<br>[08:25 ; 18:29]              | 10:02<br>[07:29 ; 15:33] | 30 (21)              | 17 (12) | 140 (100)                   | 0 (0) | 9 (6)               | 14 (10) |
| 3            | 70 000        | 52 (20)               | 52 (20) | 01:08<br>[00:31 ; 01:52]           | 01:00<br>[00:33 ; 02:00] | 05:34<br>[03:12 ; 08:28]              | 05:48<br>[04:01 ; 08:24] | 46 (33)              | 45 (32) | 80 (57)                     | 0 (0) | 12 (9)              | 20 (14) |
| 4            | 66 000        | 53 (21)               | 56 (21) | 00:46<br>[00:28 ; 01:09]           | 01:00<br>[00:33 ; 01:32] | 06:20<br>[03:35 ; 24:02]              | 07:39<br>[04:30 ; 24:24] | 61 (56)              | 45 (32) | 95 (68)                     | 0 (0) | 7 (5)               | 8 (6)   |
| 5            | 60 000        | 57 (23)               | 57 (22) | 00:44<br>[00:24 ; 01:25]           | 00:44<br>[00:24 ; 01:39] | 06:05<br>[04:18 ; 08:16]              | 06:13<br>[04:14 ; 09:23] | 44 (31)              | 32 (23) | 123 (88)                    | 0 (0) | 4 (3)               | 8 (6)   |
| 6            | 44 000        | 58 (21)               | 55 (20) | 01:04<br>[00:40 ; 02:07]           | 01:03<br>[00:33 ; 01:33] | 04:41<br>[02:59 ; 06:39]              | 06:03<br>[04:23 ; 10:08] | 23 (14)              | 30 (21) | 73 (52)                     | 0 (0) | 12 (9)              | 17 (12) |

**Supplementary table 2:** main characteristics in the six centers. CC: cross checking period. Std: Standard period. IQR: interquartile range

| Variable                                  | Cross-check<br>(N=573) | Standard<br>(N=1107) | p      |
|-------------------------------------------|------------------------|----------------------|--------|
| <b>Age</b>                                | 59.9 ± 21.1            | 56.2 ± 21.9          | 0.001  |
| <b>Median waiting time, min (IQR)</b>     | 54 (28 ; 91)           | 57 (33 ; 97]         | 0.03   |
| <b>Median length of ED stay, hr (IQR)</b> | 7.5 (5.1 ; 12.5)       | 6.3 (4.1 ; 10.2)     | <0.001 |
| <b>Chief complaint, N (%)</b>             |                        |                      | <0.001 |
| Cardiovascular                            | 41 (7)                 | 39 (4)               |        |
| Respiratory                               | 60 (11)                | 87 (8)               |        |
| Trauma                                    | 100 (17)               | 210 (19)             |        |
| Neurological                              | 63 (11)                | 87 (8)               |        |
| Abdominal                                 | 49 (9)                 | 86 (8)               |        |
| Infection / fever                         | 29 (5)                 | 49 (4)               |        |
| Intoxication                              | 4 (1)                  | 18 (2)               |        |
| Fatigue, difficulty to cope               | 41 (7)                 | 87 (8)               |        |
| Pain                                      | 97 (17)                | 251 (23)             |        |
| Other                                     | 89 (16)                | 193 (17)             |        |
| <b>Severity triage level, N (%)</b>       |                        |                      | <0.001 |
| 1 (most severe)                           | 4 (1)                  | 12 (1)               |        |
| 2                                         | 169 (30)               | 252 (23)             |        |
| 3                                         | 313 (55)               | 551 (50)             |        |
| 4                                         | 87 (15)                | 292 (26)             |        |
| <b>Comorbidities</b>                      |                        |                      |        |
| None                                      | 138 (24)               | 327 (29)             | 0.02   |
| Cardiovascular                            | 253 (44)               | 409 (37)             | 0.004  |
| Respiratory                               | 79 (13)                | 162 (14)             | 0.62   |
| Neuromuscular                             | 59 (10)                | 102 (9)              | 0.49   |
| Cognitive                                 | 39 (6)                 | 64 (5)               | 0.41   |
| Cancer                                    | 69 (12)                | 113 (10)             | 0.26   |
| Psychiatric                               | 58 (10)                | 96 (8)               | 0.34   |
| Renal                                     | 38 (6)                 | 88 (8)               | 0.33   |
| Liver and guts                            | 59 (10)                | 105 (9)              | 0.61   |
| Other                                     | 218 (38)               | 447 (40)             | 0.33   |

**Supplementary table 3:** Per-protocol population. Comparison of cross-checked patients and non cross-checked patients. IQR: interquartile range

| Variable               | Cross check<br>n=54 | Standard<br>n=90 |
|------------------------|---------------------|------------------|
| <b>Sequence order</b>  |                     |                  |
| Standard – Cross check | 34 (36)             | 60 (64)          |
| Cross-check - Standard | 20 (40)             | 30 (60)          |

**Supplementary table 4:** number (%) of adverse events. p=0.49 for period effect and p=0.18 for sequence order.
